# Supplementary material
Source: Springer Nature journal article supplement (https://www.springermedizin.de/resource/supplementary/12974_2011_383_MOESM7_ESM.pdf/9601558)

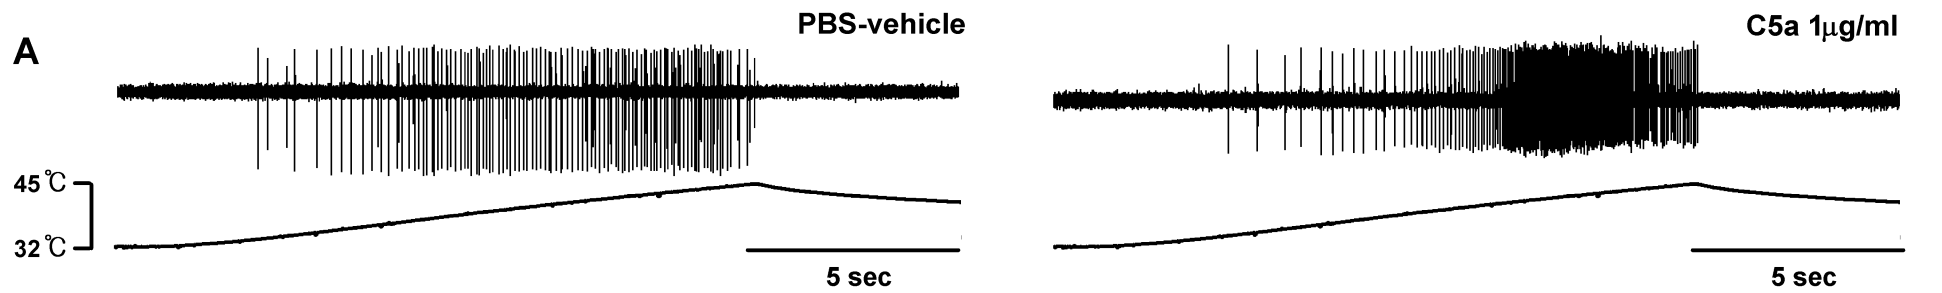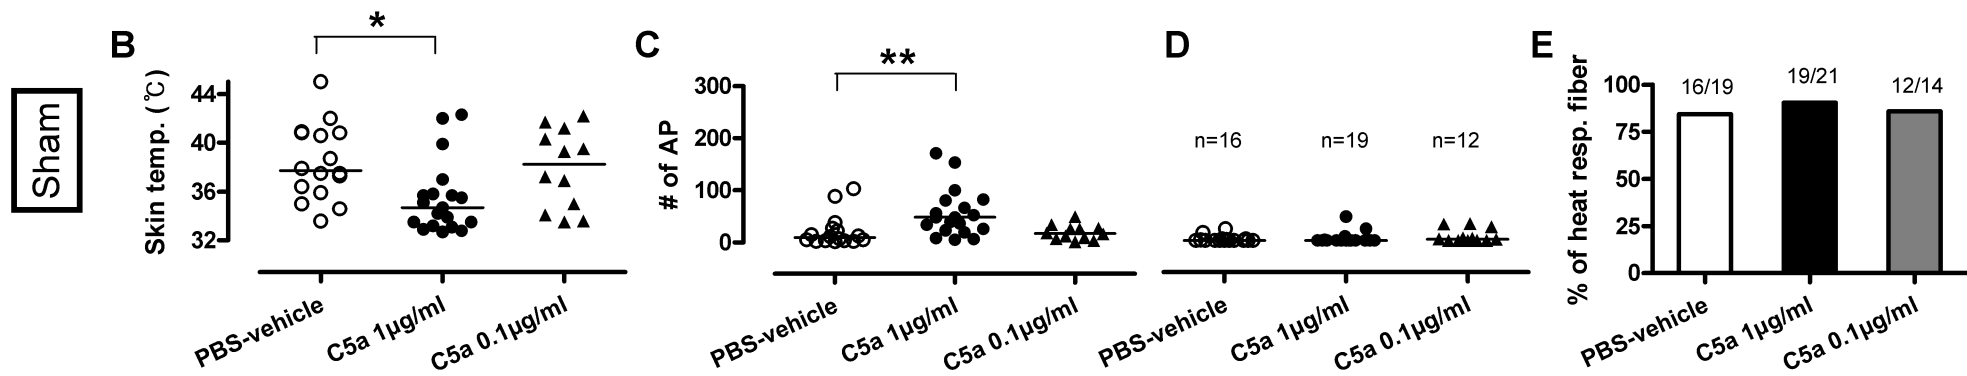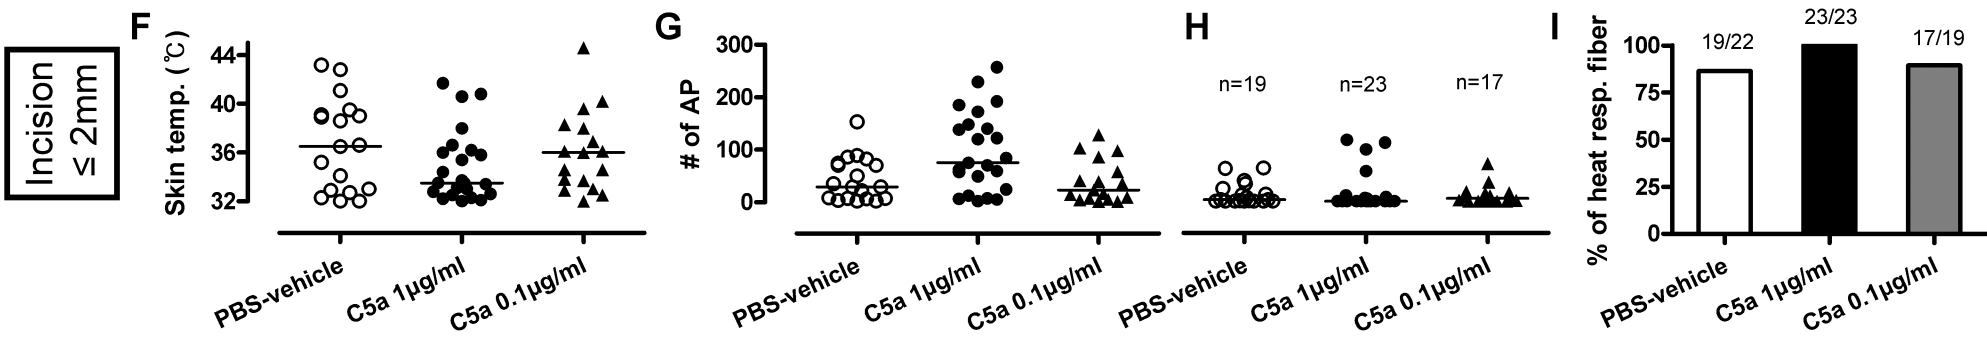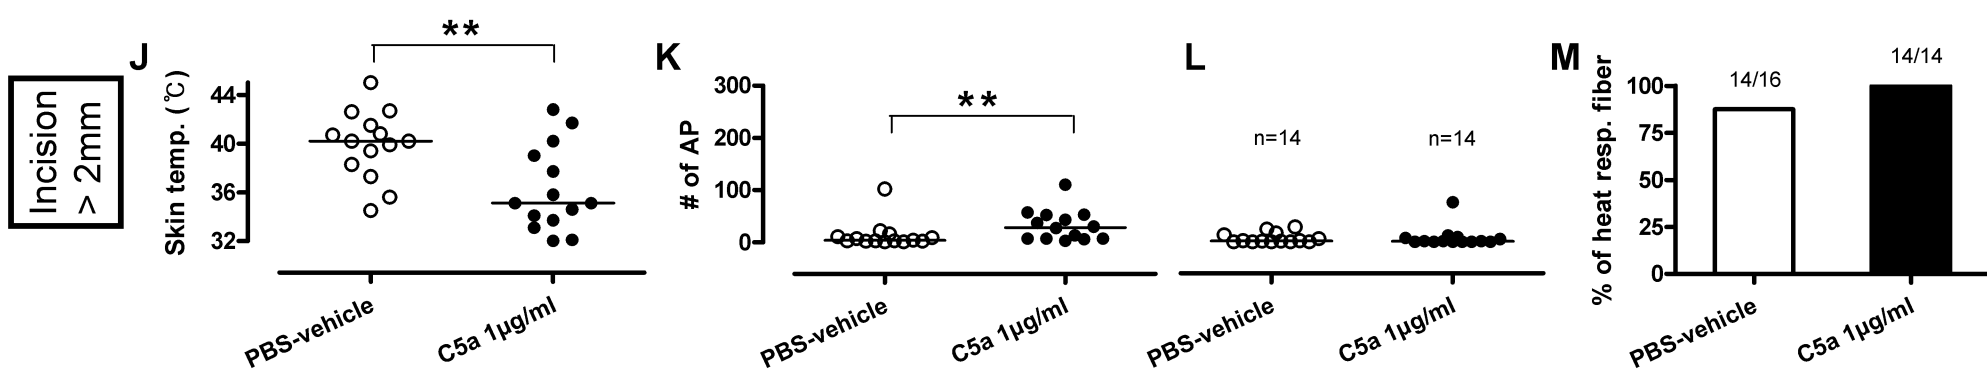

<Threshold>

<During heat (20s)>

<After heat (40s)>

Supplement: MOESM7 [file 9601558]
